# Supplementary material for: Cancer Chemoprevention by Resveratrol: The p53 Tumor Suppressor Protein as a Promising Molecular Target
Source: Molecules. 2017 Jun 18;22(6):1014. doi: 10.3390/molecules22061014 (PMC6152653; doi:10.3390/molecules22061014)
Supplement: Supplementary file 1 [file molecules-22-01014-s001.pdf]

**Table 1:** Synthesis of clinical trials with resveratrol and cancer presented in the site of [www.clinicaltrials.gov](http://www.clinicaltrials.gov) (accessed in April 2017).

| Clinical Trials.gov identifier | Number/ Year of inclusion | Status                                 | Phase              | Purpose/condition                                                                                                                                                                                                                                                                | Study type                                                                                               | Dose / duration                                                                                                                                                                                                                                                                           |
|--------------------------------|---------------------------|----------------------------------------|--------------------|----------------------------------------------------------------------------------------------------------------------------------------------------------------------------------------------------------------------------------------------------------------------------------|----------------------------------------------------------------------------------------------------------|-------------------------------------------------------------------------------------------------------------------------------------------------------------------------------------------------------------------------------------------------------------------------------------------|
| NCT002556334                   | 1 / 2005                  | Completed                              | Phase 1            | To define the actions of resveratrol on the Wnt signaling pathway in a clinical trial in which patients with colon cancer received treatment with resveratrol, and correlative laboratory studies examined its effects directly on <b>colon cancer</b> and normal colonic mucosa | Intervention model: single group<br><br>Assignment masking: open label<br><br>Primary purpose: treatment | <b>Plant-derived resveratrol tablets</b> at a dose of <b>20 or 80 mg day</b> and <b>grape powder (GP)</b> dissolved in water and taken orally at a dose of <b>80 or 120 g/day</b> .<br>Treatment will be approximately <b>14 days</b> before standard of care surgical resection of tumor |
| NCT01476592                    | 2 / 2011                  | Active, not recruiting                 | Phase 1            | To examine the effects of resveratrol and Notch-1 on <b>neuroendocrine tumor</b> tissue and to examine how people with neuroendocrine tumors who take resveratrol for up to three months tolerate the product.                                                                   | Intervention model: single group<br><br>Assignment masking: open label<br><br>Primary purpose: treatment | <b>Resveratrol 5 g/day</b> orally, in two divided doses of 2.5 g each without a break in therapy for a total of three cycles.<br>Treatment will be for <b>3 months</b> .                                                                                                                  |
| NCT02261844                    | 3 / 2014                  | This study has been withdrawn prior to | Phase 1<br>Phase 2 | The purpose of this study is to determine if resveratrol, a nutritional supplement, shows a beneficial effect in the cellular                                                                                                                                                    | Allocation: randomized<br><br>Intervention                                                               | <b>Resveratrol 1g/ daily for 10 days</b>                                                                                                                                                                                                                                                  |

|             |          |                                                                                                                                              |         |                                                                                                                                                                 |                                                                                                                                     |                                                                                                                                                                                                                        |
|-------------|----------|----------------------------------------------------------------------------------------------------------------------------------------------|---------|-----------------------------------------------------------------------------------------------------------------------------------------------------------------|-------------------------------------------------------------------------------------------------------------------------------------|------------------------------------------------------------------------------------------------------------------------------------------------------------------------------------------------------------------------|
|             |          | enrollment                                                                                                                                   |         | function of normal liver cells and diseased <b>liver cells (cancer cells)</b> in samples of liver tissue taken during elective liver surgery.                   | model: parallel<br><br>Assignment masking: Participant<br><br>Primary purpose: basic science                                        |                                                                                                                                                                                                                        |
| NCT00578396 | 4 / 2007 | The recruitment status of this study is unknown. The completion date has passed and the status has not been verified in more than two years. | Phase 1 | The purpose of this study is to determine the minimum amount of resveratrol-rich fresh red grapes needed to exhibit such signs of <b>prevention</b> .           | Allocation: randomized<br><br>Intervention model: parallel<br><br>Assignment masking: open label<br><br>Primary purpose: prevention | Dietary supplement: <b>grapes</b> (1 lb/day fresh red grapes, dose level 1)<br><br>1 pound of <b>seedless red grapes</b> (2/3 lb/day <b>fresh red grapes</b> , dose level 2)<br><br>1/3 lb/day <b>fresh red grapes</b> |
| NCT00433576 | 5 / 2007 | Completed                                                                                                                                    | Phase 1 | This phase I trial is studying the side effects and best dose of resveratrol in treating patients with <b>colorectal cancer</b> that can be removed by surgery. | Allocation: non-randomized<br><br>Intervention model: single group                                                                  | <b>Resveratrol</b> given orally <b>1g for 8 or 9 days</b>                                                                                                                                                              |

|             |          |           |         |                                                                                                                                                                   |                                                                                                                                                            |                                                                                                                                                                                                        |
|-------------|----------|-----------|---------|-------------------------------------------------------------------------------------------------------------------------------------------------------------------|------------------------------------------------------------------------------------------------------------------------------------------------------------|--------------------------------------------------------------------------------------------------------------------------------------------------------------------------------------------------------|
|             |          |           |         |                                                                                                                                                                   | Assignment<br>masking: open<br>label<br><br>Primary<br>purpose:<br>treatment                                                                               |                                                                                                                                                                                                        |
| NCT00098969 | 6 / 2004 | Completed | Phase 1 | This phase I trial is studying the side effects and best dose of resveratrol in <b>preventing cancer</b> in healthy participants.                                 | Masking: open<br>label<br><br>Primary<br>purpose:<br>prevention                                                                                            | 16 participants receive escalating doses of <b>resveratrol (from 0.5 to 5.0 g daily)</b> until the maximum tolerated dose (MTD)<br>Participants are followed at <b>2 and 7 days</b> .                  |
| NCT00920803 | 7 / 2009 | Completed | Phase 1 | The primary purpose of this study is to determine the safety and tolerability of <b>SRT501</b> in subjects with <b>colorectal cancer and hepatic metastases</b> . | Allocation:<br>randomized<br><br>Intervention<br>model: parallel<br><br>Assignment<br>masking: double<br>blind<br><br>Primary<br>purpose: basic<br>science | SRT501 was supplied in clinical kits as a powder which was reconstituted with vehicle and water into a liquid suspension. <b>SRT501 (5 g)</b> was administered orally, once daily for <b>14 days</b> . |

|             |           |           |                |                                                                                                                                                                                                                                                                                                   |                                                                                                              |                                                                                                                                                                                                                                                        |
|-------------|-----------|-----------|----------------|---------------------------------------------------------------------------------------------------------------------------------------------------------------------------------------------------------------------------------------------------------------------------------------------------|--------------------------------------------------------------------------------------------------------------|--------------------------------------------------------------------------------------------------------------------------------------------------------------------------------------------------------------------------------------------------------|
| NCT00721877 | 8 / 2008  | Completed | Phase 1        | This phase I trial studied the side effects of <b>resveratrol</b> and the effects on drug and carcinogen metabolizing enzymes.                                                                                                                                                                    | Intervention model: single group<br><br>Assignment masking: open label<br><br>Primary purpose: prevention    | Participants receive <b>oral resveratrol once daily for 4 weeks</b> .                                                                                                                                                                                  |
| NCT01370889 | 9 / 2011  | Completed | Phase 1        | In postmenopausal women with high body mass index were determined the effects of <b>resveratrol</b> on circulating sex steroid hormones and estrogen metabolites to evaluate its potentials for <b>breast cancer prevention</b>                                                                   | Intervention model: single group<br><br>Assignment masking: open label<br><br>Primary purpose: basic science | <b>Fourty subjects</b> initiated the <b>resveratrol</b> intervention ( <b>1 g daily for 12 weeks</b> ) with six withdrawn early due to adverse events                                                                                                  |
| NCT01324089 | 10 / 2011 | Completed | <b>Phase 1</b> | The purpose of this study is to see if <b>resveratrol</b> in combination with piperine is more effective than taking <b>resveratrol</b> alone. Since investigators don't know what dose of piperine to use in combination with <b>resveratrol</b> , two different doses of piperine were studied. | Allocation: randomized<br><br>Intervention model: parallel<br><br>Assignment masking: double blind           | Twenty-four participants, equal numbers of males and females, received a single dose of <b>resveratrol (2.5 grams)</b> without piperine, <b>resveratrol (2.5 grams)</b> with piperine (5 mg), or <b>resveratrol (2.5 grams)</b> with piperine (25 mg). |

|             |           |                                                                                                                                              |                    |                                                                                                                                                                                                                                                                                                       |                                                                                                                                       |                                                                                              |
|-------------|-----------|----------------------------------------------------------------------------------------------------------------------------------------------|--------------------|-------------------------------------------------------------------------------------------------------------------------------------------------------------------------------------------------------------------------------------------------------------------------------------------------------|---------------------------------------------------------------------------------------------------------------------------------------|----------------------------------------------------------------------------------------------|
|             |           |                                                                                                                                              |                    |                                                                                                                                                                                                                                                                                                       | Primary purpose: prevention                                                                                                           |                                                                                              |
| NCT01375959 | 11 / 2011 | The recruitment status of this study is unknown. The completion date has passed and the status has not been verified in more than two years. | Phase 1            | <b>Resveratrol</b> has many potential benefits, including prolonging lifespan, <b>preventing cancer</b> and heart disease and normalization of glucose metabolism. Although use of this agent shows great promise in the <b>treatment and/or prevention of diabetes</b> .                             | Allocation: randomized intervention<br><br>Model: crossover assignment<br><br>Masking: double blind<br><br>Primary purpose: treatment | 500 mg capsules, 3 capsules ( <b>1500 mg of resveratrol</b> ) orally twice a day for 6 weeks |
| NCT01842399 | 12 / 2013 | This study is currently recruiting participants                                                                                              | Phase 1<br>Phase 2 | <b>Resveratrol</b> has many potential benefits, including prolonging lifespan, <b>preventing cancer</b> and heart disease and normalization of glucose metabolism. The purpose of this trial is to test the effects of different dose levels of resveratrol on <b>heart and blood vessel health</b> . | Allocation: randomized<br><br>Intervention model: parallel assignment<br><br>Masking: double blind<br><br>Primary purpose: prevention | <b>Resveratrol (75 mg or 150mg, 2x/day, orally) for 12 months</b>                            |

|             |           |                                                                                                                                              |         |                                                                                                                                                                                                                                                   |                                                                                                                                            |                                                                                                                                                                                                                                                                                                                                                                                                       |
|-------------|-----------|----------------------------------------------------------------------------------------------------------------------------------------------|---------|---------------------------------------------------------------------------------------------------------------------------------------------------------------------------------------------------------------------------------------------------|--------------------------------------------------------------------------------------------------------------------------------------------|-------------------------------------------------------------------------------------------------------------------------------------------------------------------------------------------------------------------------------------------------------------------------------------------------------------------------------------------------------------------------------------------------------|
| NCT01714102 | 13 / 2012 | This study is ongoing, but not recruiting participants                                                                                       | Phase 2 | The underlying causes of metabolic syndrome are obesity, being overweight, physical inactivity and genetic factors. <b>Resveratrol</b> can decrease the chance of developing <b>diabetes, cancer and/or heart disease</b> .                       | Allocation: randomized<br><br>Intervention model: parallel<br><br>Assignment masking: double blind<br><br>Primary purpose: treatment       | <b>Resveratrol (1 g) for 30 days</b>                                                                                                                                                                                                                                                                                                                                                                  |
| NCT00455416 | 14 / 2007 | The recruitment status of this study is unknown. The completion date has passed and the status has not been verified in more than two years. | Phase 2 | A dietary intervention study in patients with Follicular Lymphoma stage III/IV to assess the ability of <b>several dietary factors</b> to induce apoptosis, inhibit cell proliferation and modulate <b>tumor</b> cell infiltrate <i>in vivo</i> . | Allocation: non-randomized<br><br>Intervention model: single group<br><br>Assignment masking: open Label<br><br>Primary purpose: treatment | The dietary intervention is composed of omega 3 fatty acids (EPA (eicosapentaenoic acid) and DHA (docosahexaenoic acid)) 1000 mg x 5 daily, Selenium (L-Seleno methionine), 100 mcg x 2 daily, Garlic extract (Allicin), 6 garlic pearls daily; Pomegranate juice 100% (ellagic acid), <b>Grape juice (resveratrol, quercetin)</b> , Green Tea (Epigallocatechin gallate), 2 cups daily for 16 weeks. |
| NCT00920556 | 15 / 2009 | This study has been terminated.                                                                                                              | Phase 2 | The primary purpose of this study is to determine the safety and tolerability of                                                                                                                                                                  | Intervention model: single group                                                                                                           | <b>SRT501 (5 g)</b> will be supplied in clinical kits as a                                                                                                                                                                                                                                                                                                                                            |

|             |           |           |         |                                                                                                                                                                                                                                                                                                                      |                                                                                                                                               |                                                                                                                                                                                                                                                                                                                                                                      |
|-------------|-----------|-----------|---------|----------------------------------------------------------------------------------------------------------------------------------------------------------------------------------------------------------------------------------------------------------------------------------------------------------------------|-----------------------------------------------------------------------------------------------------------------------------------------------|----------------------------------------------------------------------------------------------------------------------------------------------------------------------------------------------------------------------------------------------------------------------------------------------------------------------------------------------------------------------|
|             |           |           |         | <p><b>SRT501</b> with or without bortezomib administration, when administered once daily in 21 day cycles, in male and female subjects with <b>multiple myeloma</b>.</p>                                                                                                                                             | <p>Assignment masking: open label</p> <p>Primary purpose: treatment</p>                                                                       | <p>powder which will be reconstituted with vehicle and water into a liquid suspension. <b>SRT501</b> will be administered <b>orally as a liquid suspension for 20 consecutive days in each 21 day cycle</b>.</p> <p>Bortezomib (1.3 mg/m<sup>2</sup>) will be given as an intravenous solution in a 3-5 second push on Day 1, 4, 8 and 11 in every 21 day cycle.</p> |
| NCT01492114 | 16 / 2011 | Completed | Phase 3 | <p>This research will investigate the hypothesis that <b>resveratrol</b> when given orally to healthy adult smokers induces a decrease in the inflammatory and oxidative mediators which characterize the low-grade systemic inflammatory state and the oxidants-antioxidants imbalance of <b>tobacco users</b>.</p> | <p>Allocation: randomized</p> <p>Intervention model: crossover</p> <p>Assignment masking: double blind</p> <p>Primary purpose: prevention</p> | <p><b>Resveratrol (500 mg)</b> first was submitted to: <b>30 days</b> of treatment, one tablet/day in the morning at fasting; then to 30 days of wash-out (no supplementation), and then to 30 days of treatment with placebo (one tablet/day in the morning at fasting).</p>                                                                                        |

|             |           |                                                                                                                                              |         |                                                                                                                                                                          |                                                                                                                                       |                                                           |
|-------------|-----------|----------------------------------------------------------------------------------------------------------------------------------------------|---------|--------------------------------------------------------------------------------------------------------------------------------------------------------------------------|---------------------------------------------------------------------------------------------------------------------------------------|-----------------------------------------------------------|
| NCT02837107 | 17 / 2016 | This study is ongoing, but not recruiting participants.                                                                                      | Phase 1 | This clinical trial was conducted in order to investigate the effects of a multi-micronutrient supplement against oxidative stress in apparently <b>healthy adults</b> . | Allocation: randomized<br><br>Intervention model: parallel<br><br>Assignment masking: double blind<br><br>Primary purpose: prevention | Dietary supplement: 80mL Mind Master* / day for 8 weeks   |
| NCT01720459 | 18 / 2012 | The recruitment status of this study is unknown. The completion date has passed and the status has not been verified in more than two years. | Phase 1 | Effects of micronized trans-resveratrol treatment on clinical, endocrine, metabolic and biochemical parameters of women with <b>polycystic ovary syndrome</b>            | Allocation: randomized<br><br>Intervention Model: parallel<br><br>Assignment masking: single blind<br><br>Primary purpose: treatment  | <b>Micronized trans-resveratrol (500 mg) for 3 months</b> |
| NCT02766803 | 19 / 2016 | This study is currently                                                                                                                      | Phase 4 | This study is designed to evaluate the endocrine and metabolic effects of                                                                                                | Allocation: randomized                                                                                                                | Drug: Simvastatin (20 mg) and <b>micronized trans-</b>    |

|             |           |                                 |         |                                                                                                                                                                                                                                                                    |                                                                                                                                            |                                                                                                                                                                                                                                                 |
|-------------|-----------|---------------------------------|---------|--------------------------------------------------------------------------------------------------------------------------------------------------------------------------------------------------------------------------------------------------------------------|--------------------------------------------------------------------------------------------------------------------------------------------|-------------------------------------------------------------------------------------------------------------------------------------------------------------------------------------------------------------------------------------------------|
|             |           | recruiting participants         |         | simvastatin and resveratrol on <b>polycystic ovary syndrome</b>                                                                                                                                                                                                    | Intervention model: single group<br><br>Assignment masking: double blind<br><br>Primary purpose: treatment                                 | <b>resveratrol (500 mg)</b><br><b>Maximum 6 months of treatment</b>                                                                                                                                                                             |
| NCT01489319 | 20 / 2011 | This study has been terminated. | Phase 1 | Effect of salsalate and <i>Polygonum cuspidatum</i> extract (PCE) containing <b>resveratrol</b> on lipid-induced inflammation, ovarian androgen secretion, body composition and ovulation in a subset of normal weight women with <b>polycystic ovary syndrome</b> | Allocation: non-randomized<br><br>Intervention model: parallel<br><br>Assignment masking: no masking<br><br>Primary purpose: basic science | Drug: Salsalate<br>4 out of 10 subjects will receive salsalate 2.0 gm twice a day for 12 weeks; 4 out of 10 subjects will receive <i>Polygonum cuspidatum</i> extract (PCE) 200 mg containing 20% resveratrol twice a day for <b>12 weeks</b> . |

\*The supplement contained per 80ml, *Aloe barbadensis* miller gel (USA/Mexico 36%), grape juice, *Polygonum cuspidatum* extract (that contain 10% resveratrol), green tea extract, 1.1 mg vitamin B1 (100% RDA), 2.5 µg vitamin B12 (100% RDA), 12 mg vitamin E (α - TE) (100% RDA), coenzyme Q10, 200 µg folic acid (100% RDA), ascorbic acid, 27.5 µg selenium (100% RDA), 4.2 mg iron (100% RDA).
